# Supplementary material for: Conditional survival in multiple myeloma and impact of prognostic factors over time
Source: PubMed Central journal article supplement (PMC10185675; doi:10.1038/s41408-023-00852-4), 2023-05-15
Supplement: 41408_2023_852_MOESM1_ESM.pdf [file 41408_2023_852_MOESM1_ESM.pdf]

### Supplemental Figure 1:

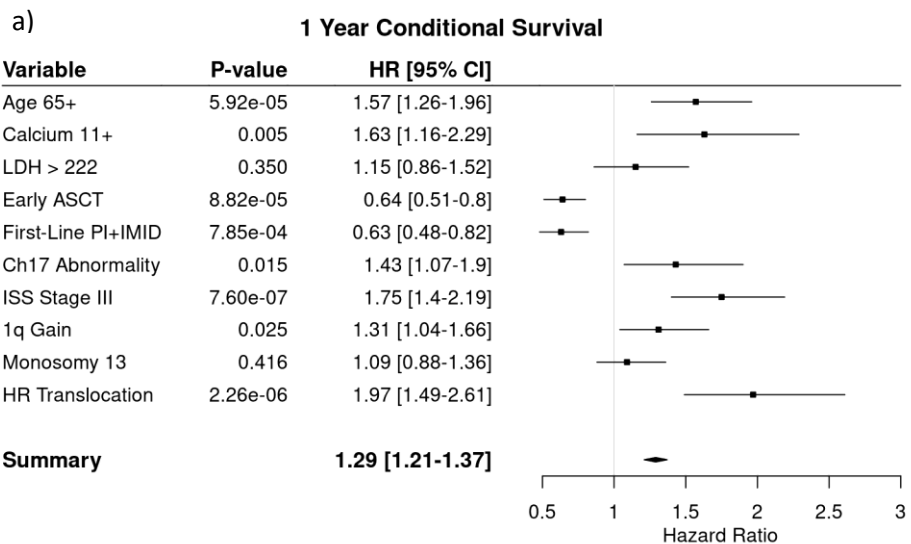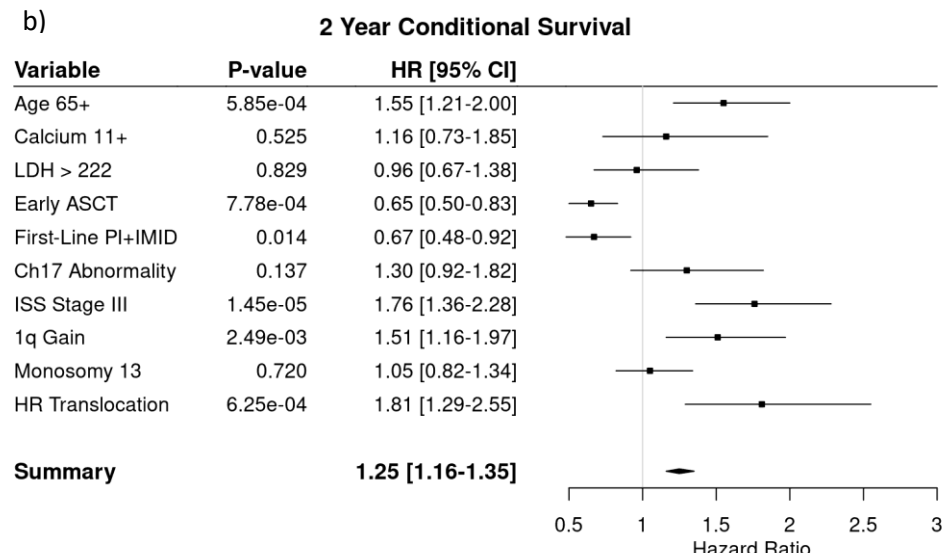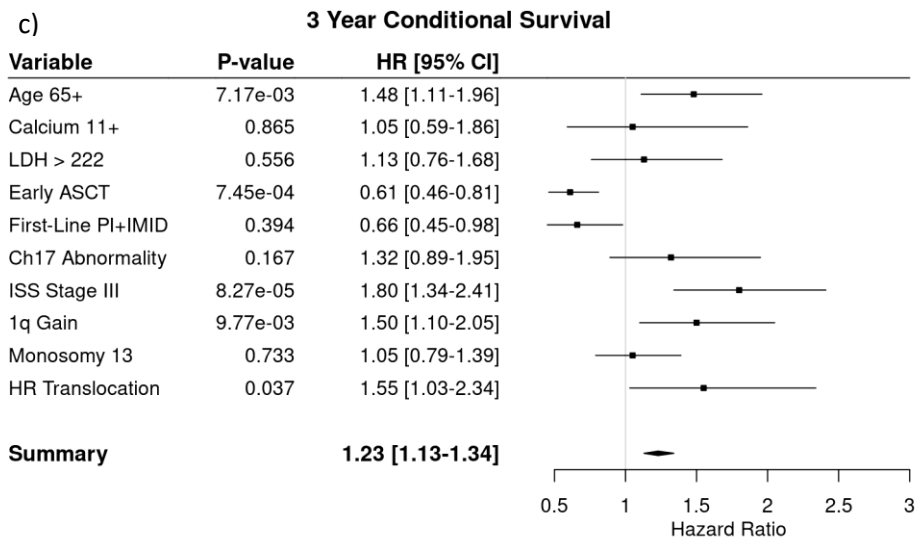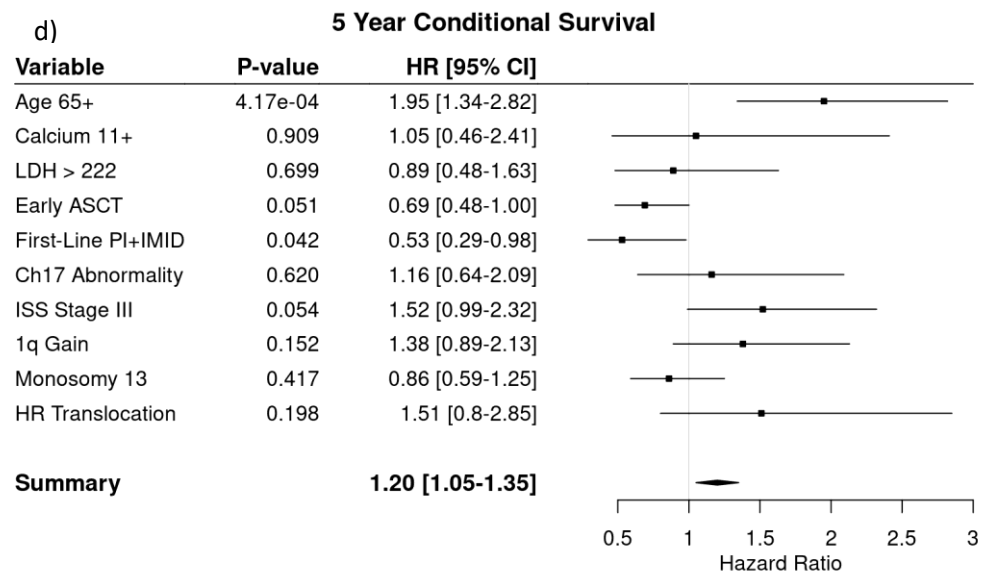

**Supplemental Figure 1:** Forest Plots of Multivariate Conditional Survival Models for patients surviving a) 1 year, b) 2 years, c) 3 years, and d) 5 years from diagnosis. *Abbreviations: ASCT: autologous stem cell transplantation, CI: confidence interval, HR: hazard ratio, IMiD: immunomodulatory drug, ISS: international staging system, LDH: lactate dehydrogenase, PI: proteasome inhibitor*
